# 1 **Prevalence of gastrointestinal symptoms is higher close to** 2 **the sea: evidence from coastal Bangladesh**

3  
4 Ammatul Fardousi<sup>1</sup>, Masuma Novak<sup>1</sup>, Sharoardy Sagar<sup>1</sup>, Srizan Chowdhury<sup>2</sup>, Rehnuma  
5 Haque<sup>1</sup>, Habibur Rahman<sup>3</sup>, Iqbal Kabir<sup>4</sup>, Manzoor Ahmed Hanifi<sup>1</sup>

6  
7 <sup>1</sup> Health Systems and Population Studies Division, International Centre for Diarrhoeal  
8 Disease Research, Bangladesh (icddr,b), Dhaka, Bangladesh

9 <sup>2</sup> Research and Evaluation Department, Sajida Foundation, Dhaka, Bangladesh

10 <sup>3</sup> Support Services, International Centre for Diarrhoeal Disease Research, Bangladesh  
11 (icddr,b), Dhaka, Bangladesh

12 <sup>4</sup> Climate Change and Health Promotion Unit, Ministry of Health and Family Welfare,  
13 Dhaka, Bangladesh

14  
15  
16 \* Ammatul Fardousi

17 e-mail: [dr.ammatul@gmail.com](mailto:dr.ammatul@gmail.com) (AF)

18

19

20

## 21 **Abstract**

22 **Background:** Sea level rise, heavy rainfall, flooding, and temperature changes due to climate  
23 change contribute to the spread of enteric infections, disrupting normal intestinal functions  
24 and leading to gastrointestinal (GI) symptoms such as nausea, vomiting, and diarrhea etc.  
25 Coastal regions of Bangladesh are projected to be highly vulnerable to diarrheal diseases and  
26 cholera outbreaks by 2050. However, there is limited research on how coastal proximity  
27 affects GI health. Thus, we aimed to examine the association between GI symptoms and  
28 geographic distance from the sea in a coastal area of Bangladesh. **Materials and methods:**  
29 This study was conducted in the Chakaria Health and Demographic Surveillance System area  
30 of icddr,b which is running since 1999. A total of 61,295 household members were  
31 interviewed between 2012 and 2016. GI symptoms were chosen as the primary outcome  
32 measure of this study. We employed chi-square tests and logistic regression analysis model.  
33 **Result:** Overall, 7% reported experiencing one or more GI symptoms in the previous two  
34 weeks. Diarrhea was the most prevalent symptom (35%), followed by heartburn (22%) and  
35 abdominal pain (18%). Prevalence was significantly higher among females (8%,  $p<0.05$ ),  
36 older adults (13%,  $p<0.05$ ), and individuals from lower socioeconomic backgrounds (8%,  
37  $p<0.05$ ). Seasonal variation was observed, with the highest prevalence in summer (9%,  
38  $p<0.05$ ) and the lowest in winter (5%,  $p<0.05$ ). Additionally, participants living within 15  
39 kilometers (aOR: 1.35, 95% CI: 1.24-1.46) and 15-20 kilometers (aOR: 1.23, 95% CI: 1.10-  
40 1.38) of the sea had a higher risk of GI symptoms compared to those residing more than 20  
41 kilometers away, after adjusting for other covariates. **Conclusion:** Our finding demonstrates  
42 that individuals residing near the coast have a higher prevalence of GI symptoms. This  
43 evidence suggests the need for targeted public health strategies to improve GI health in  
44 climate vulnerable coastal populations. Also, further research is needed to determine the

45 causal effect as well as the underlying biological mechanisms of GI symptoms in these  
46 population.

## 47 **Introduction**

48 Climate change stands as the paramount global health concern of the twenty-first century,  
49 posing significant risks to human health. Bangladesh, a low-lying deltaic nation, is highly  
50 vulnerable to the impacts of climate change. The geomorphology of the country,  
51 characterized by a vast network of river systems and a coastline of 711 kilometers (km) [1,  
52 2], makes it susceptible to natural hazards [3, 4]. The country's coastal regions which lie only  
53 1 to 3 meters above mean sea level, are mainly prone to seawater contamination of drinking  
54 water sources [3-5]. As sea level rise, water salinity is expected to increase, further  
55 exacerbating the risk of high salinity in groundwater [6]. The consumption of saline water has  
56 been associated with a range of health effects, including infant mortality, cholera outbreaks,  
57 and diarrheal diseases [7, 8].

58 Climate Change also alters environmental dynamics, such as high ambient temperature,  
59 changing precipitation patterns, facilitate the spread and survival of pathogens which directly  
60 pose risk to human infectious diseases [9, 10]. Among these, Gastrointestinal (GI) infections  
61 account for a large proportion of mortality and morbidity worldwide [11]. Symptoms of GI  
62 infections such as diarrhea, vomiting, abdominal pain, and heartburn are prevalent in both  
63 developed and developing countries [12-14]. These symptoms ranged from mild to severe,  
64 and can lead to shock, coma, and even death particularly to vulnerable populations including  
65 children, elderly, and those with weakened immune systems [15].

66 Diarrheal diseases, in particular, are the second major cause of death among under five  
67 children globally, and also the second highest cause of death and disability in low- and  
68 middle-income countries [16]. Transmission of diarrheal disease is facilitated by lack of

69 sufficient or safe water, and climate change has the potential to alter the disease frequency  
70 and distribution [16]. High temperatures can affect the survival, replication and virulence of  
71 pathogen [16]. Additionally, water scarcity, driven by flooding and infrastructure damage,  
72 impedes access to safe water, and hygiene practices, further facilitating the transmission of  
73 enteric pathogens [17, 18].

74 By 2050, coastal regions of Bangladesh are projected to be highly vulnerable to diarrheal  
75 diseases and cholera outbreaks [19]. These impacts substantially will affect the livelihood and  
76 health of people living near to the coast [20]. In Chakaria, tube well water salinity ranges  
77 from 34 mg/L to 2000 mg/L, with concentrations exceeding WHO recommended limits and  
78 increasing as proximity to the sea decreases [21]. Women residing within 20 (km) of the  
79 coastline have a 1.3-fold increased risk of miscarriage [21]. Furthermore, 14% of children  
80 aged 6 to 11 months living within 15 (km) of the coast are severely malnourished [21].  
81 Despite these issues, the prevalence of GI symptoms in coastal areas has rarely been  
82 examined. Therefore, this study aimed to examine the association between GI symptoms and  
83 geographic distance from the sea in a coastal area of Bangladesh.

## 84 **Materials and methods**

### 85 **Settings and study population**

86 This population-based study was conducted in Chakaria upazila (sub-district) in the Cox's  
87 Bazar district, located in the southeastern coastal region of Bangladesh. International Centre  
88 for Diarrhoeal Disease Research, Bangladesh (icddr,b) has been operating a Health and  
89 Demographic Surveillance System (HDSS) in Chakaria since 1999. The HDSS covers 89,633  
90 people living in 17,955 households across 49 villages. Surveillance worker quarterly visits  
91 the households to gather basic demographic information, including birth, death, marriage, and

92 migration [21]. The site is strategically divided into six blocks based on the land category and  
93 proximity to the coastline (Fig 1).

94 **Fig 1. Map of the location of Chakaria Health and Demographic Surveillance System**  
95 **and the Bay of Bengal**

96 Geographically, Chakaria is similar to other coastal areas in Chittagong district but differs  
97 from the rest of the country [22]. It comprises coastal, plain, and hilly areas, and is considered  
98 a hotspot to monitor the impacts of climate change on health. Additionally, Chakaria is a  
99 relatively low-performing area in terms of health and development indicators compared to  
100 central and western parts of the country [22]. In 2011, Chakaria HDSS started collecting  
101 geographical information system (GIS) data, recording the geolocations of villages, mosques,  
102 temples, hospitals, schools, tube wells, households, rivers, and roads in degree decimal  
103 format.

104 Between 2012 to 2016, we surveyed a total of 61,295 individuals living in 11,398 households  
105 in the Chakaria HDSS area. During data collection, respondents were asked whether they had  
106 experienced any GI symptoms in the two weeks prior to the interview. Also, information on  
107 sociodemographic characteristics were collected. However, asset quintiles and GIS data were  
108 retrieved from the existing HDSS database. However, we excluded 1,109 individuals living  
109 in 75 households due to the incomplete information of the study variables— i.e., household  
110 assets or GIS data. Finally, 60,186 individuals from 11,323 were included in this study (Fig  
111 2).

112 **Fig 2. Study population according to inclusion and exclusion criteria (2012-2016)**

## 113 **Definition of variables**

### 114 **GI symptoms**

115 GI symptoms refer to chronic or recurrent complaints affecting different parts of the digestive  
116 system, including the pharynx, esophagus, stomach, biliary tract, intestines, or anorectum  
117 [14]. In this study GI symptoms were the primary outcome measure, defined as the presence  
118 of one or more of the following symptoms e.g., diarrhea, heartburn, abdominal pain, nausea,  
119 vomiting, bloating and the passage of mucus with stool.

### 120 **Socioeconomic status (SES)**

121 In this study SES was measured using household asset quintiles, which were determined by  
122 the number and types of assets owned by household members. The list includes almirah,  
123 table, chair, cycle, bed, motorcycle, electric fan, telephone, television, fridge, sofa, sewing  
124 machine, electricity, showcase, and watch or clock.

### 125 **Distance from the sea**

126 Spatial information was collected using GIS to detect and localize the clusters of GI  
127 symptoms. To quantify the distance from the sea, the average aerial distance of all  
128 households within each village from the nearest shoreline point was calculated and utilized as  
129 the metric for the village's proximity to the sea (Fig 1).

### 130 **Season**

131 We considered these four seasons ‘Summer’ from March-May, ‘Monsoon’ from June-  
132 September, ‘Autumn’ from October-November and ‘Winter’ from December-February [23],  
133 in accordance with the seasonal patterns recognized in Bangladesh.

## 134 **Data analysis**

135 The prevalence of GI symptoms was disaggregated across socio-economic characteristics of  
136 the samples, distance from the sea and seasonal variation. The average aerial distance of the  
137 villages from the nearest coastline was calculated and categorized into 3 groups: <15 km, 15 to  
138 20 km and 20 to 30 km from the sea. Respondent’s age was calculated in completed years  
139 from the date of birth. Principal component analysis was used to calculate household asset  
140 index scores. All the households were categorized into five equal quintiles, where the first  
141 quintile is the poorest 20% of households and the fifth quintile is the wealthiest 20% of  
142 households. To see the seasonal variation of the symptom prevalence we categorized it into  
143 four groups-summer, monsoon, autumn, and winter.

144 Chi-square tests were used to investigate the association between the outcome and exposure  
145 variables. Multi-level mixed-effect logistic regression was performed to estimate crude odds  
146 ratios (cOR) and adjusted odds ratios (aOR) to examine the relationship between geographic  
147 distance from the sea and prevalence of GI symptoms, adjusting for age, sex, SES, season,  
148 and blocks and villages as a source of random effects. P-values less than 0.05 were  
149 considered statistically significant. Frequencies and percentages were used for most variables.  
150 To assess the association, we calculated the crude and adjusted odds ratios (OR) with 95%  
151 confidence intervals (CI). STATA version 16 was used to analyze data and ArcGIS version  
152 10 was used for creating maps.

## 153 **Ethics statement**

154 The studies involving human participants were reviewed and approved by Ethical Review  
155 Committee of icddr,b. Informed written consent was obtained from the participants. For the  
156 minors, consent was obtained from the parents or guardians.

## 157 **Result**

### 158 **Background characteristics of study population**

159 Of the 60,186 participants included in the study, half of them belong to the age group of 15 to  
160 44 years (45%) and a substantial proportion (12%) of respondents were under 5 years. The  
161 proportion of male (49%) and female (51%) was almost equal. After calculating the average  
162 distance of all households from the nearest shoreline of the coast, we found that one third of  
163 the participants were living within 15 km (27%) from the sea (Table 1).

164 **Table 1. Background characteristics of study population, 2012-2016 (N=60,186)**

| <b>Characteristics</b>                   | <b>Proportion (n)</b> |
|------------------------------------------|-----------------------|
| <b>Distance from sea (in kilometers)</b> |                       |
| <15                                      | 26.9 (16,177)         |
| 15 – 20                                  | 39.2 (23,577)         |
| 20 – 30                                  | 33.9 (20,432)         |
| <b>Age (in years)</b>                    |                       |
| 0 – 4                                    | 12.4 (7,471)          |
| 5 – 14                                   | 28.1 (16,922)         |
| 15-44                                    | 44.9 (27,027)         |
| 45-64                                    | 10.8 (6,504)          |
| 65+                                      | 3.8 (2,262)           |



| <b>Sex</b>                   |               |
|------------------------------|---------------|
| Male                         | 49.5 (29,779) |
| Female                       | 50.5 (30,407) |
| <b>Socio-economic status</b> |               |
| Lowest                       | 17.5 (10,526) |
| Second                       | 18.2 (10,916) |
| Middle                       | 21.5 (12,949) |
| Fourth                       | 20.6 (12,412) |
| Highest                      | 22.2 (13,383) |
| <b>Season</b>                |               |
| Summer                       | 40.5 (24,372) |
| Monsoon                      | 30.2 (18,191) |
| Autumn                       | 3.1 (1,885)   |
| Winter                       | 26.2 (15,738) |

165

## 166 **Prevalence of GI symptoms**

167 Overall 7% participants reported having experienced one or more GI symptoms in the  
168 previous 14 days. Diarrhea (36%), heartburn(21%) and abdominal pain (20%) were the most  
169 common symptoms reported. Other symptoms included nausea or vomiting (9%), bloating  
170 (9%) and presence of mucus in stool (5%) (Fig 3).

## 171 **Fig 3. Distribution of Gastrointestinal symptoms in the study population**

172 **GI symptoms by distance from sea, demographic characteristics,**  
 173 **and season**

174 The prevalence of GI symptoms differs significantly according to geographic distance from  
 175 sea, age, sex, SES and season. Prevalence of GI symptoms was found to decrease with  
 176 increasing distance from the sea. The highest prevalence observed in participants living  
 177 within 15 km (9%) from the sea compared to those living more than 20 km (7%) away. The  
 178 prevalence was higher among females (8%) than men (7%), older people aged  $\geq 65$  years  
 179 (13%), and those from lower socioeconomic background (8%) compared to their other  
 180 counterparts. The prevalence was highest in summer (9%) and monsoon (8%) compared to  
 181 winter season (Table 2).

182 **Table 2. Percentage of Gastrointestinal symptoms (%) by distance from sea,**  
 183 **demographic characteristics, and season**

| Characteristics                          | % of Gastrointestinal symptoms | P-value |
|------------------------------------------|--------------------------------|---------|
| <b>Distance from sea (in kilometers)</b> |                                |         |
| <15                                      | 8.6 (1,385/16,177)             | <0.001  |
| 15 – 20                                  | 7.8 (1,830/23,577)             |         |
| 20 – 30                                  | 6.6 (1,357/20,432)             |         |
| <b>Age (in years)</b>                    |                                |         |
| 0 – 4                                    | 10.7 (800/7,471)               | <0.001  |
| 5 – 14                                   | 4.3 (731/16,922)               |         |
| 15-44                                    | 7.3 (1,970/27,027)             |         |
| 45-64                                    | 11.8 (768/6,504)               |         |
| 65+                                      | 13.4 (303/2,262)               |         |
| <b>Sex</b>                               |                                |         |

|                              |                    |        |
|------------------------------|--------------------|--------|
| Male                         | 6.8 (2,036/29,779) | <0.001 |
| Female                       | 8.3 (2,536/30,407) |        |
| <b>Socio-economic status</b> |                    |        |
| Lowest                       | 8.3 (874/10,526)   | <0.001 |
| Second                       | 8.3 (907/10,916)   |        |
| Middle                       | 7.6 (1028/12,949)  |        |
| Fourth                       | 7.4 (913/12,412)   |        |
| Highest                      | 6.6 (889/13,383)   |        |
| <b>Season</b>                |                    |        |
| Summer                       | 8.8 (2,140/24,372) | <0.001 |
| Monsoon                      | 8.3 (1,510/18,191) |        |
| Autumn                       | 5.9 (112/1,885)    |        |
| Winter                       | 5.2 (810/15,738)   |        |

184

185 In regression model, we observed that participants residing within 15 km from the sea, there  
 186 was 35% (95% CI: 1.20-1.51) more risk of suffering from GI symptoms compared to those  
 187 living between 20-30 km. After adjusted for age, sex, SES and the season the odds for  
 188 experiencing GI symptoms according to geographic distance from sea were 37% ( 95% CI:  
 189 1.20-1.57) higher near to the coast (Table 3).

190 **Table 3. Percentage of crude and adjusted\* odds ratio according to distance from sea**

| <b>Distance from sea (in kilometers)</b> | <b>Crude odds ratio (95% CI)</b> | <b>Adjusted odds ratio (95% CI)</b> | <b>P-value</b> |
|------------------------------------------|----------------------------------|-------------------------------------|----------------|
| <15                                      | 1.35 (1.20 - 1.51)               | 1.37 (1.20 - 1.57)                  | <0.001         |
| 15 – 20                                  | 1.19 (1.07 - 1.31)               | 1.23 (1.10 - 1.38)                  | <0.001         |
| 20 - 30                                  | Ref                              | Ref                                 |                |

191 \*Adjusted for age, sex, SES and season

## 192 **Discussion**

193 This is the first population-based study to estimate the association between GI symptoms and  
194 geographic proximity to the sea in a coastal area of Bangladesh. We observed that 7% of  
195 participants reported experiencing GI symptoms within the previous 14 days. There was a  
196 37% (95% CI, 1.20-1.57) higher risk among those living closer to the sea (within 15 km).

197 Global studies have reported varying prevalence rates of GI symptoms, ranging from 14% to  
198 61% [24-28]. However, the observed variations in the estimated prevalence across different  
199 countries can be attributed to multiple factors including differences in study population,  
200 lifestyle, diagnostic criteria and recall period [29]. Moreover the recall period for symptom  
201 reporting varied among studies, from one week in USA [24], two weeks in Iran [26] to one  
202 month in Turkey [27]. In case of study population, USA [24] and Turkey [27] included  
203 individuals above 18 years, in India the focus was on elderly people aged 45 or above [28]  
204 and Iran included participants from all age [26]. Our study included all age group population  
205 in coastal area and the recall period was 14 days. While another study in Bangladesh by  
206 Praveen et al., in individuals aged over 15 years used Rome III diagnostic criteria for adult  
207 functional dyspepsia and focused on upper GI symptoms, where the recall period was 3  
208 months [25].

209 In our study, diarrhea, heartburn, and abdominal pain were the most frequently reported GI  
210 symptoms. This finding aligns with Sezgin et al., [27] where the most prevalent GI symptom  
211 reported was heartburn (29%). However, abdominal pain is a common complaint across  
212 countries [30]. The increased risk of GI symptoms among those living closer to the sea is  
213 linked to several factors including limited access to safe water, proper hygiene practices,

214 which facilitates the transmission of enteric pathogens [9, 10]. Additionally, a significant  
215 association was found between high salinity in drinking water and hospital visits for diarrhea  
216 and abdominal pain [3]. Moreover, disruptions in the gut microbiome, caused by  
217 environmental stressors such as exposure to contaminated and saline water, are increasingly  
218 recognized as a factor in gastrointestinal diseases. These disturbances can lead to dysbiosis,  
219 reducing microbial diversity and compromising immune function, thereby heightening  
220 susceptibility to GI symptoms [31, 32]. Together, these factors create a complex interplay of  
221 environmental and biological risks that disproportionately affect coastal populations,  
222 explaining the increased prevalence of gastrointestinal issues in these areas.

223 In this study, age, sex, SES and season were significantly associated with GI symptoms. The  
224 prevalence of GI symptoms was highest in elderly people aged  $\geq 65$  years. This finding aligns  
225 with reports by Chaplin et al., and Zuchelli et al., who also observed a high prevalence of GI  
226 symptoms in ageing population [33, 34]. This can be attributed to the ageing-related  
227 physiological changes in the GI system, including alterations in motility, releasing enzyme  
228 and hormone, digestion, and absorption, as well as pathological condition which are more  
229 prevalent in this age group [28, 35].

230 However, GI symptoms are gender-specific, and our study observed higher prevalence among  
231 women which is consistent with other studies as well [27, 36]. Hormones, particularly  
232 estrogen affects the intestinal microbiomes and immune cells, and menstrual cycle affects GI  
233 transit duration, leading to GI symptoms [36]. Additionally, Stuart et al., found that low  
234 social class is linked with GI symptoms, which aligns with our study findings [37]. Several  
235 factors contribute to this disparity, including limited access to clean water, sanitation  
236 facilities, and healthcare resources among economically disadvantaged populations [14].

237 The prevalence of GI symptoms was highest during the summer season in our study. Several  
238 factors may contribute to this finding. Rising atmospheric temperature and changing weather  
239 patterns in summer exacerbate challenges related to nutrition and clean water [38]. A study  
240 conducted by Na et al., found a strong association between temperature and infectious  
241 diarrhea [39]. Also, due to the increase in rainfall events in summer, enteric infections rise  
242 accordingly [38]. Because these two events eventually alter the survival, replication,  
243 virulence and mobilization of enteric pathogen [16].

## 244 **Strengths and limitations**

245 Our study utilized data from a coastal HDSS area with a large sample size, which makes the  
246 observed relationship more reliable. And we mapped spatial distribution of GI symptoms  
247 based on proximity to the sea, providing insights into geographic patterns. And this study is  
248 the first to explore this link, providing insights in an under-research area in Bangladesh.  
249 There are some shortcomings in our study. Firstly, we relied on self-reported data, which  
250 introduces the potential for recall bias and underreporting of GI symptoms. Additionally, our  
251 study includes cross sectional study design, which limits the ability to identify the causal  
252 relationships between risk factors and GI symptoms.

## 253 **Conclusions**

254 We conclude that individuals residing near the coast have a higher prevalence of GI  
255 symptoms. This evidence suggests the need for targeted public health strategies to improve  
256 GI health in climate vulnerable coastal populations. Also, further research is needed to  
257 determine the causal effect as well as the underlying biological mechanisms of GI symptoms  
258 in these population.

## 259 **Acknowledgments**

260 We would like to thank the villagers and team members of Chakaria HDSS for their  
261 cooperation. We gratefully acknowledge icddr,b, as well as the Governments of Bangladesh  
262 and Canada for providing core/unrestricted support to icddr,b.

## 263 **References**

- 264 1. Hossain M. Macrobenthic community structure from a tropical estuary. Germany:  
265 LAP publishing company; 2011.
- 266 2. Minar MH, Hossain MB, Shamsuddin MJM-EJoSR. Climate change and coastal zone  
267 of Bangladesh: vulnerability, resilience and adaptability. 2013;13(1):114-20.
- 268 3. Chakraborty R, Khan KM, Dibaba DT, Khan MA, Ahmed A, Islam MZJIjoer, et al.  
269 Health implications of drinking water salinity in coastal areas of Bangladesh.  
270 2019;16(19):3746.
- 271 4. Mondal MS, Jalal MR, Khan M, Kumar U, Rahman R, Huq H. Hydro-meteorological  
272 trends in southwest coastal Bangladesh: perspectives of climate change and human  
273 interventions. 2013.
- 274 5. Hoque MA, Scheelbeek P, Vineis P, Khan A, Ahmed KM, Butler APJCC. Drinking  
275 water vulnerability to climate change and alternatives for adaptation in coastal South and  
276 South East Asia. 2016;136:247-63.
- 277 6. Faruque A, Alam B, Nahar B, Parvin I, Barman AK, Khan SH, et al. Water,  
278 Sanitation, and Hygiene (WASH) Practices and Outreach Services in Settlements for  
279 Rohingya Population in Cox's Bazar, Bangladesh, 2018–2021. 2022;19(15):9635.
- 280 7. Grant SL, Tamason CC, Hoque BA, Jensen PKMJTM, Health I. Drinking cholera:  
281 salinity levels and palatability of drinking water in coastal B angladesh. 2015;20(4):455-61.

- 282 8. Dasgupta S, Huq M, Wheeler DJWE, Policy. Drinking water salinity and infant  
283 mortality in coastal Bangladesh. 2016;2(01):1650003.
- 284 9. Watts N, Adger WN, Agnolucci P, Blackstock J, Byass P, Cai W, et al. Health and  
285 climate change: policy responses to protect public health. 2015;386(10006):1861-914.
- 286 10. Mora C, McKenzie T, Gaw IM, Dean JM, von Hammerstein H, Knudson TA, et al.  
287 Over half of known human pathogenic diseases can be aggravated by climate change.  
288 2022;12(9):869-75.
- 289 11. Morens DM, Folkers GK, Fauci ASJN. The challenge of emerging and re-emerging  
290 infectious diseases. 2004;430(6996):242-9.
- 291 12. Iacono G, Merolla R, D'amico D, Bonci E, Cavataio F, Di Prima L, et al.  
292 Gastrointestinal symptoms in infancy: a population-based prospective study. 2005;37(6):432-  
293 8.
- 294 13. Hunt R, Quigley E, Abbas Z, Eliakim A, Emmanuel A, Goh K-L, et al. Coping with  
295 common gastrointestinal symptoms in the community: a global perspective on heartburn,  
296 constipation, bloating, and abdominal pain/discomfort May 2013. 2014;48(7):567-78.
- 297 14. Gizaw Z, Addisu A, Guadie D. Common Gastrointestinal Symptoms and Associated  
298 Factors Among Under-5 Children in Rural Dembiya, Northwest Ethiopia: A Community-  
299 Based Cross-Sectional Study. Environmental health insights. 2020;14:1178630220927361.  
300 doi: 10.1177/1178630220927361.
- 301 15. Hall J. The Impact of Climate Change on Water Quality and Health [Internet].  
302 Canada: KRAKEN SENSE. 2023 25. [cited 12 August 2024]. Available from:  
303 <https://krakensense.com/blog/the-impact-of-climate-change-on-water-quality-and-health>.
- 304 16. Levy K, Smith SM, Carlton EJJ Cehr. Climate change impacts on waterborne diseases:  
305 moving toward designing interventions. 2018;5:272-82.



- 306 17. Prüss-Ustün A, Bartram J, Clasen T, Colford J, Cumming OJTM, Health I. others.  
307 2014. “Burden of Diarrheal Disease from Inadequate Water, Sanitation and Hygiene in Low-  
308 and Middle-Income Countries: A Retrospective Analysis of Data from 145 Countries.”.  
309 2014;19(8):894-905.
- 310 18. UNICEF. Water, sanitation and hygiene (WASH) and climate change 2023 [cited 15  
311 July 2024]. Available from: <https://www.unicef.org/wash/climate>.
- 312 19. Kabir MI, Rahman MB, Smith W, Lusha MAF, Milton AH. Child Centred Approach  
313 to Climate Change and Health Adaptation through Schools in Bangladesh: A Cluster  
314 Randomised Intervention Trial. PLOS ONE. 2015;10(8):e0134993. doi:  
315 10.1371/journal.pone.0134993.
- 316 20. Kabir R, Khan HT, Ball E, Caldwell K. Climate Change Impact: The Experience of  
317 the Coastal Areas of Bangladesh Affected by Cyclones Sidr and Aila. Journal of  
318 environmental and public health. 2016;2016:9654753. Epub 2016/11/22. doi:  
319 10.1155/2016/9654753. PubMed PMID: 27867400; PubMed Central PMCID:  
320 PMC5102735.
- 321 21. Hanifi M, Khalek A, Chakraborty S, Mahmood S, Rasheed S, Iqbal M. CHAKARIA  
322 HEALTH AND DEMOGRAPHIC SURVEILLANCE SYSTEM REPORT-2017 Focusing on  
323 Health and Climate Change2019.
- 324 22. Khatun F, Hanifi S, Iqbal M, Rasheed S, Rahman MS, Ahmed T, et al. Prospects of  
325 mHealth services in Bangladesh: recent evidence from Chakaria. 2014;9(11):e111413.
- 326 23. Shahid S. Recent trends in the climate of Bangladesh. Climate Research.  
327 2010;42(3):185-93.
- 328 24. Almario CV, Ballal ML, Chey WD, Nordstrom C, Khanna D, Spiegel BMJTAjog.  
329 Burden of gastrointestinal symptoms in the United States: results of a nationally  
330 representative survey of over 71,000 Americans. 2018;113(11):1701.

- 331 25. Perveen I, Rahman MM, Saha MJJoEMC. Upper gastrointestinal symptoms in  
332 general population of a district in Bangladesh. 2014;4(2):79-88.
- 333 26. Khoshbaten M, Hekmatdoost A, Ghasemi H, Entezariasl MJJjogojotISoG. Prevalence  
334 of gastrointestinal symptoms and signs in northwestern Tabriz, Iran. 2004;23(5):168-70.
- 335 27. Sezgin O, Akpınar H, Özer B, Törüner M, Bal K, Bor SJTTJoG. Population-based  
336 assessment of gastrointestinal symptoms and diseases: Cappadocia Cohort, Turkey.  
337 2019;30(12):1009.
- 338 28. Dawoodi S, Dawoodi I, Dixit PJFiPH. Gastrointestinal problem among Indian adults:  
339 Evidence from longitudinal aging study in India 2017–18. 2022;10:911354.
- 340 29. Sobieraj DM, Coleman SM, Coleman CIJTAjomc. US prevalence of upper  
341 gastrointestinal symptoms: a systematic literature review. 2011;17(11):e449-58.
- 342 30. Quigley E, Locke G, Mueller-Lissner S, Paulo L, Tytgat G, Helfrich I, et al.  
343 Prevalence and management of abdominal cramping and pain: a multinational survey.  
344 2006;24(2):411-9.
- 345 31. Takiishi T, Fenero CIM, Câmara NOSJTb. Intestinal barrier and gut microbiota:  
346 Shaping our immune responses throughout life. 2017;5(4):e1373208.
- 347 32. Olesen SW, Alm EJNM. Dysbiosis is not an answer. 2016;1(12):1-2.
- 348 33. Chaplin A, Curless R, Thomson R, Barton RJBJoGP. Prevalence of lower  
349 gastrointestinal symptoms and associated consultation behaviour in a British elderly  
350 population determined by face-to-face interview. 2000;50(459):798-802.
- 351 34. Zuchelli T, Myers SEJGC. Gastrointestinal issues in the older female patient.  
352 2011;40(2):449-66.
- 353 35. Dumic I, Nordin T, Jecmenica M, Stojkovic Lalosevic M, Milosavljevic T,  
354 Milovanovic TJCJoG, et al. Gastrointestinal tract disorders in older age.  
355 2019;2019(1):6757524.

- 356 36. Liu T, Liu J, Wang C, Zou D, Wang C, Xu T, et al. Prevalence of gastrointestinal  
357 symptoms and their association with psychological problems in youths. 2023.  
358 2023;12(2):311-23.
- 359 37. Howell SC, Quine S, Talley NJ. Low social class is linked to upper  
360 gastrointestinal symptoms in an Australian sample of urban adults. 2006;41(6):657-66.
- 361 38. Wang J-K, He Y, Chen L-L, Zhang H-X, Qi X-J, Sun L, et al. A population-based  
362 survey of the prevalence of self-reported acute gastrointestinal illness in Zhejiang Province,  
363 China. 2022;17(5):e0268717.
- 364 39. Na Z, Xiaohui M, Lu G, Yiyun W, Peiyuan S, Deshan Z, editors. Research on the  
365 application of medical-meteorological forecast model of infectious diarrhea disease in  
366 Beijing. 2010 IEEE Fifth International Conference on Bio-Inspired Computing: Theories and  
367 Applications (BIC-TA); 2010: IEEE.
- 368

# Block map of Chakaria HDSS

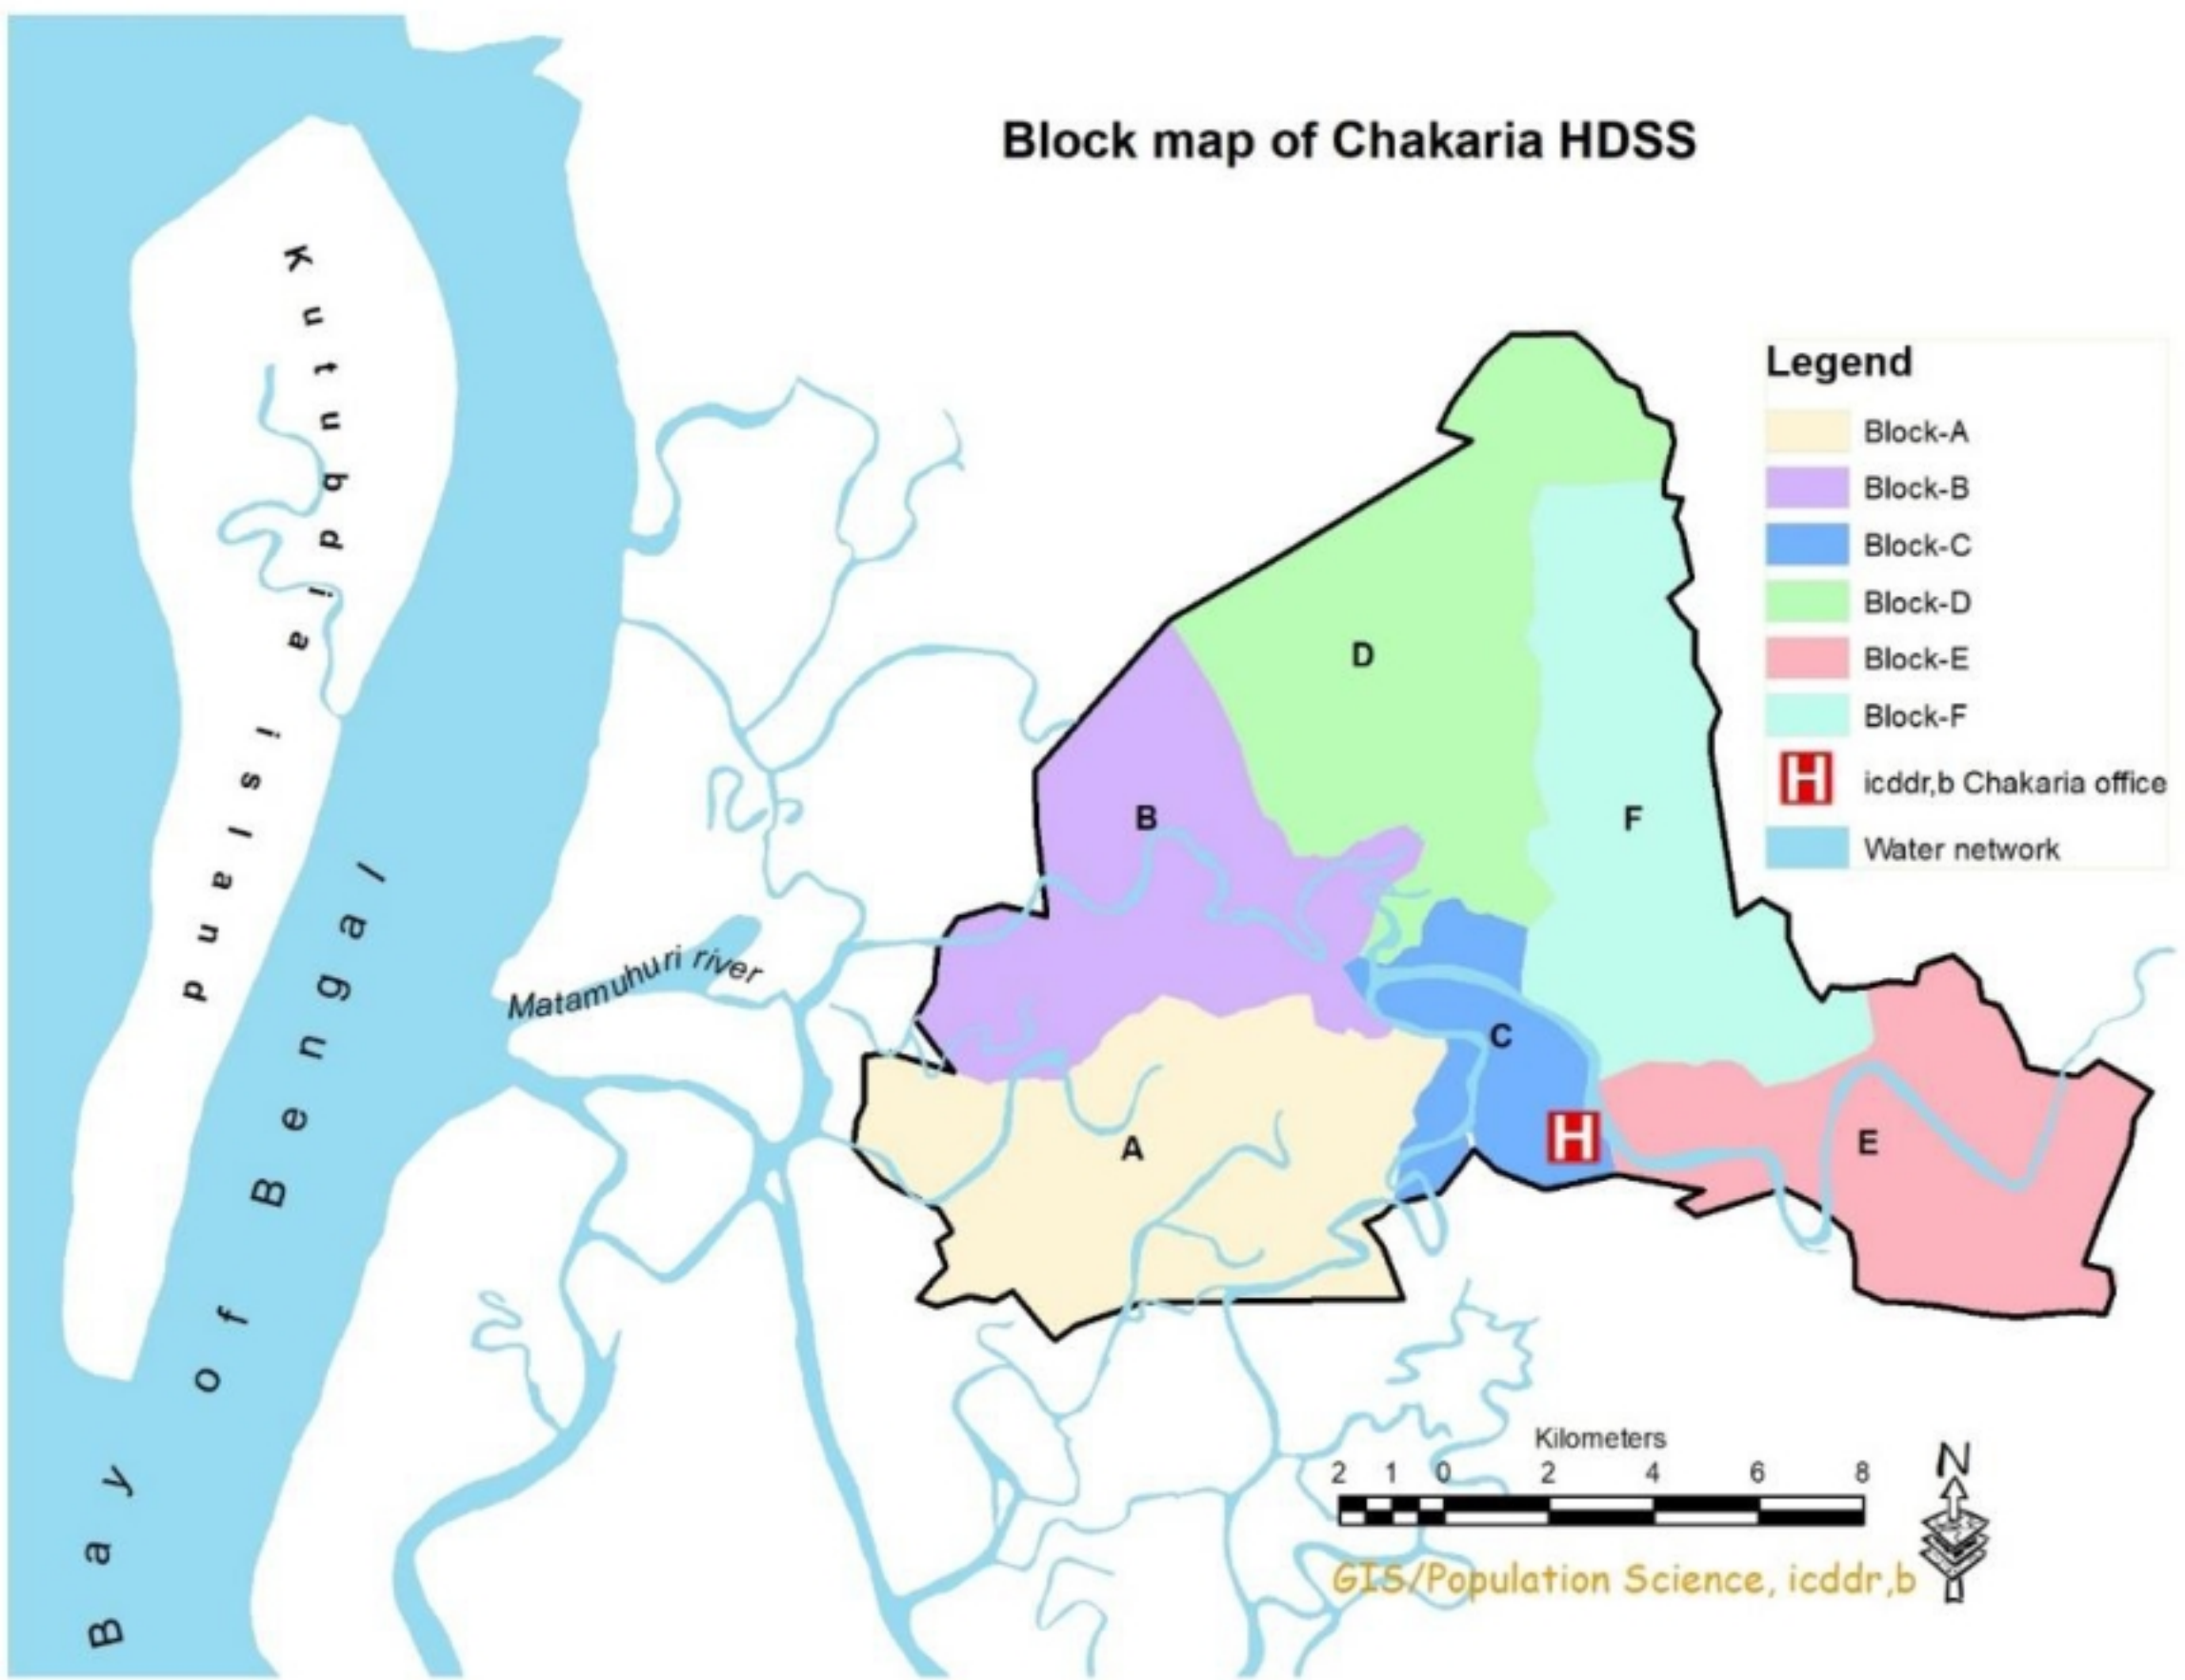

Fig 1

## Chakaria HDSS

Period: 2012-2016

Total Households: 11,398

Total individuals: 61,295

Exclude for analysis (Missing  
information on household's assets/GIS  
data)

Total Households: 75

Total individuals: 1,109

Included in analysis

Total households: 11,323

Total individuals: 60,186

Fig 2

# Gastrointestinal symptoms, n=5,058

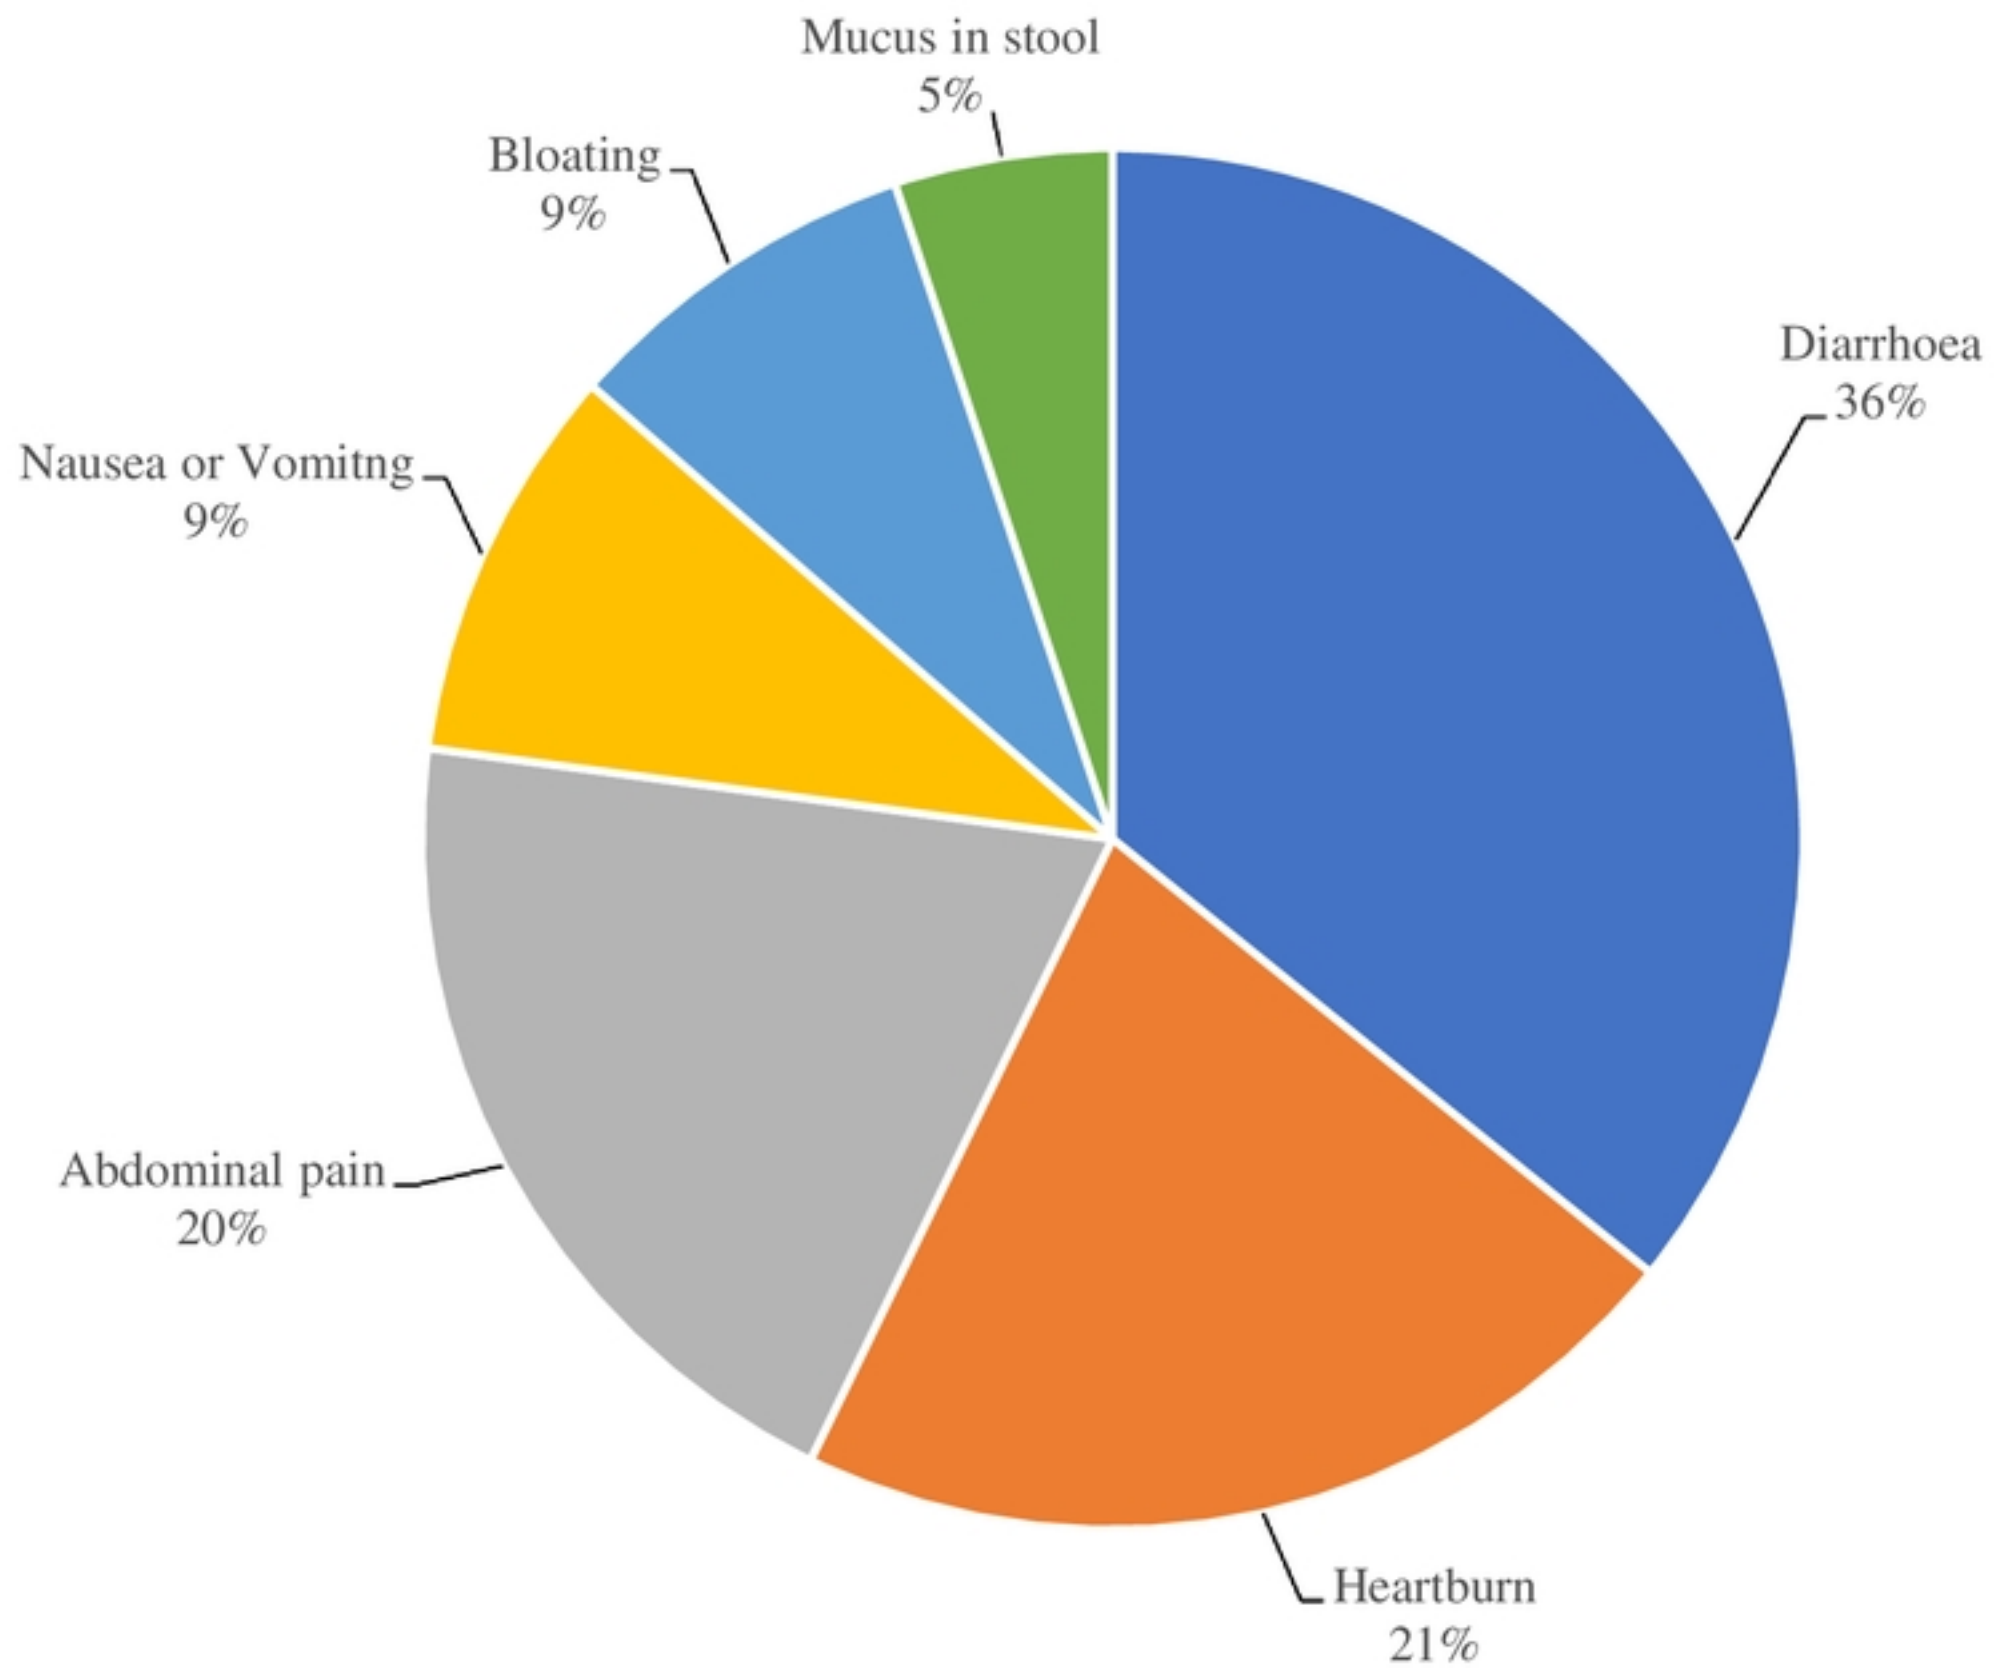

Fig 3
